# Supplementary material
Source: Springer Nature journal article supplement (https://www.springermedizin.de/resource/supplementary/12905_2009_198_MOESM2_ESM.pdf/9518156)

■ nonsmoking (n=15)  
■ smoking (n=17)

A

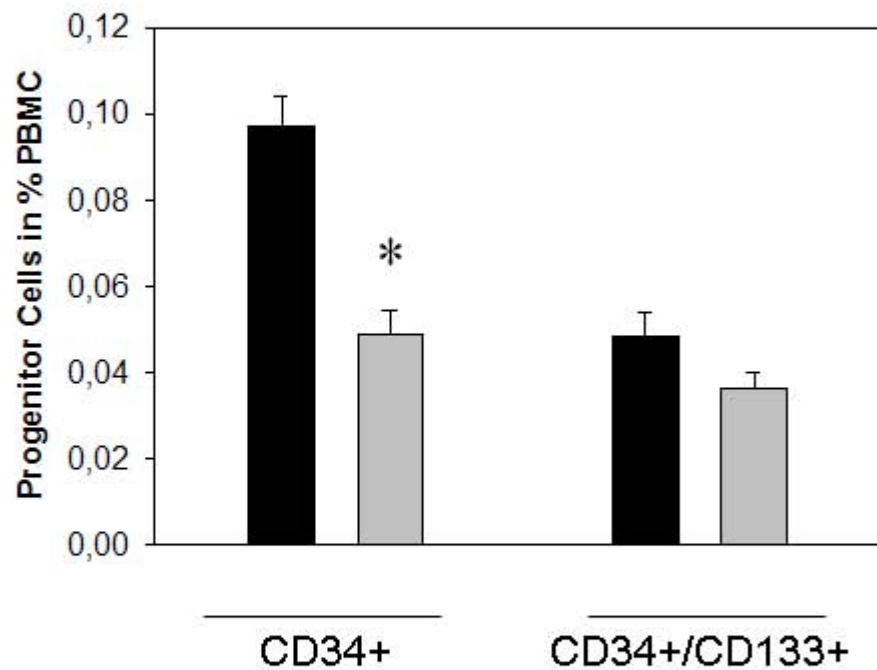

B

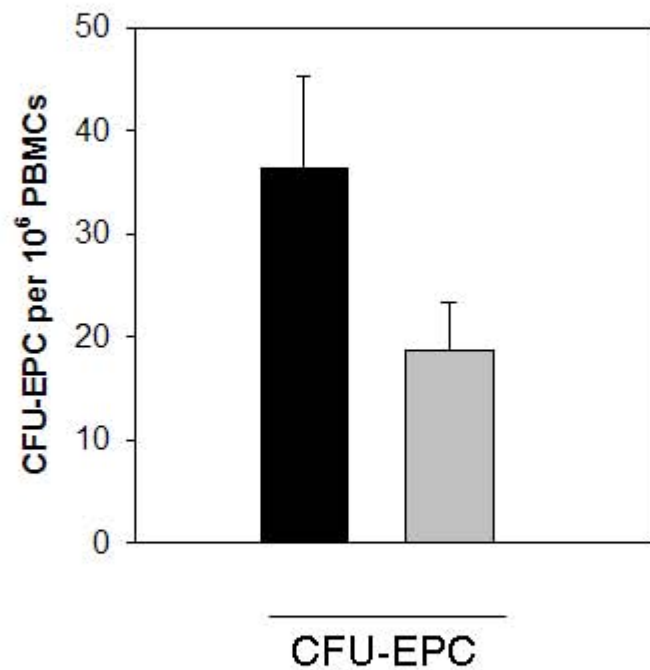

Supplement: MOESM2 [file 9518156]
